# Supplementary material for: The association of serum vitamin K2 levels with Parkinson's disease: from basic case-control study to big data mining analysis
Source: Aging (Albany NY). 2020 Aug 29;12(16):16410–9. doi: 10.18632/aging.103691 (PMC7485738; doi:10.18632/aging.103691)
Supplement: Supplementary Table 1 [file aging-12-103691-s001..xlsx]

## Sheet: GeneBody-regulated
gene	SiteID	BK_1027	BK_680	BK_574	BK_1182	BK_476	A10_98	G07_145	X29_09	A08_86	A08_10	logFC	P.Value	adj.P.Val	mutant_AVG	parental_AVG	CHR	Strand	feature	cgi	EnsemblID	baseMean	log2FoldChange	lfcSE	stat	pvalue	padj	CORE.ENRICHMENT
C1QC	cg04522691	0.721661	0.710954	0.674805	0.706643	0.713373	0.625229	0.658127	0.607706	0.657635	0.631797	-0.0737446	0.000147552	0.0540991	0.762143	0.688399	1	R	Body	shore	ENSG00000159189.7	1175.59	0.591514	0.215787	2.7412	0.00612154	0.0708618	Yes
C3	cg04089739	0.741653	0.722766	0.707971	0.736606	0.726019	0.674412	0.664344	0.626942	0.609026	0.621134	-0.0954645	0.000369951	0.0730705	0.786571	0.691106	19	R	Body	opensea	ENSG00000125730.12	2840.48	0.485225	0.199568	2.43138	0.0150416	0.11487	Yes
F10	cg05539101	0.802986	0.824663	0.807523	0.820282	0.801596	0.781285	0.787297	0.76723	0.75997	0.77745	-0.0308079	0.00350397	0.16424	0.882263	0.851455	13	R	Body	opensea	ENSG00000126218.7	51.0414	0.415906	0.151691	2.7418	0.00611036	0.0708575	Yes
C3	cg03015114	0.392144	0.387109	0.439918	0.336119	0.417323	0.343849	0.332567	0.318547	0.363565	0.291509	-0.0817202	0.0046745	0.182463	0.409223	0.327503	19	F	Body	shore	ENSG00000125730.12	2840.48	0.485225	0.199568	2.43138	0.0150416	0.11487	Yes
F10	cg00968875	0.67158	0.717011	0.650719	0.671265	0.673139	0.611087	0.628017	0.658081	0.640551	0.612328	-0.0477346	0.00767922	0.218445	0.729394	0.681659	13	R	Body	opensea	ENSG00000126218.7	51.0414	0.415906	0.151691	2.7418	0.00611036	0.0708575	Yes
F10	cg04578149	0.83896	0.859503	0.821228	0.826776	0.847528	0.787119	0.832933	0.783262	0.793262	0.765438	-0.0392974	0.00792628	0.221095	0.911921	0.872624	13	R	Body	shore	ENSG00000126218.7	51.0414	0.415906	0.151691	2.7418	0.00611036	0.0708575	Yes
PROC	cg03744893	0.872424	0.885023	0.868135	0.877838	0.870248	0.846365	0.847167	0.840372	0.799969	0.819198	-0.0320058	0.0103305	0.244071	0.945276	0.91327	2	R	Body	shore	ENSG00000115718.13	27.2029	0.423375	0.129483	3.26973	0.00107651	0.0288931	Yes
F10	cg21860560	0.453013	0.420437	0.419628	0.399238	0.425113	0.403725	0.367816	0.395663	0.350085	0.346615	-0.0648697	0.0118727	0.257737	0.44213	0.37726	13	R	Body	island	ENSG00000126218.7	51.0414	0.415906	0.151691	2.7418	0.00611036	0.0708575	Yes
C3	cg05284873	0.433841	0.391577	0.404713	0.450624	0.419328	0.398036	0.396136	0.312354	0.32648	0.320062	-0.0880636	0.0124151	0.262078	0.43833	0.350267	19	R	Body	shore	ENSG00000125730.12	2840.48	0.485225	0.199568	2.43138	0.0150416	0.11487	Yes
VWF	cg26796518	0.80193	0.781919	0.755963	0.783017	0.734606	0.659614	0.757868	0.715013	0.717127	0.729035	-0.0557558	0.0156826	0.285823	0.771487	0.715731	12	R	Body	opensea	ENSG00000110799.9	2978.81	0.256588	0.184548	1.39036	0.16442	0.409187	Yes
C3	cg14042714	0.763718	0.766444	0.81198	0.800706	0.790767	0.751907	0.75927	0.628802	0.713982	0.725867	-0.0728633	0.0243986	0.335994	0.854346	0.781483	19	R	Body	island	ENSG00000125730.12	2840.48	0.485225	0.199568	2.43138	0.0150416	0.11487	Yes
SERPINF2	cg10516117	0.54923	0.602791	0.520835	0.597966	0.558396	0.409478	0.559697	0.491222	0.506225	0.513404	-0.0805392	0.0253992	0.340885	0.603617	0.523078	17	F	Body	shore	ENSG00000167711.9	107.46	0.713348	0.173805	4.10431	4.05526e-05	0.00491665	Yes
C3	cg10628785	0.767411	0.773729	0.754918	0.766397	0.792697	0.761231	0.751268	0.736975	0.725425	0.723114	-0.0263987	0.0359819	0.386502	0.836518	0.810119	19	F	Body	shore	ENSG00000125730.12	2840.48	0.485225	0.199568	2.43138	0.0150416	0.11487	Yes
F10	cg08143875	0.663123	0.619057	0.61071	0.607639	0.611323	0.639326	0.564061	0.562094	0.565418	0.573192	-0.0415522	0.038191	0.395016	0.62237	0.580818	13	F	Body	island	ENSG00000126218.7	51.0414	0.415906	0.151691	2.7418	0.00611036	0.0708575	Yes
PLAUR	cg06540636	0.215687	0.242221	0.185952	0.230904	0.193469	0.144522	0.194339	0.152787	0.196585	0.210619	-0.0560177	0.0458158	0.420514	0.198188	0.142171	19	F	Body	shore	ENSG00000011422.7	135.044	0.583309	0.171109	3.409	0.00065202	0.0224815	Yes
CFB	cg17335741	0.603911	0.617313	0.570704	0.602479	0.630397	0.488273	0.587693	0.575674	0.613816	0.537953	-0.0475656	0.0662189	0.474092	0.648078	0.600512	6	F	Body	opensea	ENSG00000243649.4	76.7669	0.43172	0.170364	2.5341	0.0112738	0.098359	Yes
PROC	cg09287938	0.865395	0.860506	0.843283	0.849517	0.84981	0.83731	0.82781	0.717491	0.838572	0.775557	-0.0473803	0.0711263	0.485524	0.926756	0.879376	2	F	Body	island	ENSG00000115718.13	27.2029	0.423375	0.129483	3.26973	0.00107651	0.0288931	Yes
SERPING1	cg12783776	0.0735796	0.063753	0.0515452	0.0734769	0.056412	0.0416634	0.0556289	0.0405566	0.0360947	0.0613007	-0.011679	0.0790764	0.502594	0.0211718	0.00949273	11	R	Body	opensea	ENSG00000149131.11	1505.18	0.234779	0.177132	1.32544	0.185024	0.436022	Yes
C1QB	cg18366830	0.822599	0.838156	0.80981	0.817522	0.8294	0.774181	0.784021	0.791948	0.810083	0.813133	-0.0200887	0.0901758	0.524053	0.895927	0.875839	1	R	Body	opensea	ENSG00000173369.11	1576.59	0.541045	0.217794	2.4842	0.0129842	0.106812	Yes
C1QC	cg11152959	0.869036	0.857813	0.844107	0.828048	0.853328	0.83856	0.815484	0.797092	0.845649	0.807029	-0.0187069	0.0979228	0.538012	0.923217	0.90451	1	F	Body	island	ENSG00000159189.7	1175.59	0.591514	0.215787	2.7412	0.00612154	0.0708618	Yes

## Sheet: TSS-regulated
Supplementary Table 1. Inflammatory genes that were differentially methylated in both gene body and TSS site.
gene	SiteID	BK_1027	BK_680	BK_574	BK_1182	BK_476	A10_98	G07_145	X29_09	A08_86	A08_10	logFC	P.Value	adj.P.Val	mutant_AVG	parental_AVG	CHR	Strand	feature	cgi	EnsemblID	baseMean	log2FoldChange	lfcSE	stat	pvalue	padj	CORE.ENRICHMENT
PROC	cg25457027	0.898417	0.90327	0.9021	0.899632	0.902032	0.920402	0.918555	0.921256	0.92105	0.939437	0.0161885	0.00308116	0.157042	0.965375	0.981564	2	F	TSS1500	shore	ENSG00000115718.13	27.2029	0.423375	0.129483	3.26973	0.00107651	0.0288931	Yes
F10	cg26608199	0.837974	0.852594	0.806095	0.849608	0.805764	0.854645	0.892346	0.85641	0.858009	0.845391	0.038163	0.0078609	0.220473	0.902761	0.940924	13	R	TSS1500	shelf	ENSG00000126218.7	51.0414	0.415906	0.151691	2.7418	0.00611036	0.0708575	Yes
C2	cg05195129	0.863913	0.870244	0.868251	0.851195	0.88165	0.862608	0.902664	0.882628	0.898975	0.863926	0.0176245	0.0404302	0.40269	0.938504	0.956129	6	R	TSS1500	opensea	ENSG00000166278.10	80.8212	0.257624	0.168318	1.53058	0.125873	0.356259	Yes
